# Supplementary material
Source: PubMed Central journal article supplement (PMC7161462)
Supplement: jcsm.16.4.575.SD1.pdf [file jcsm.16.4.575.SD1.pdf]

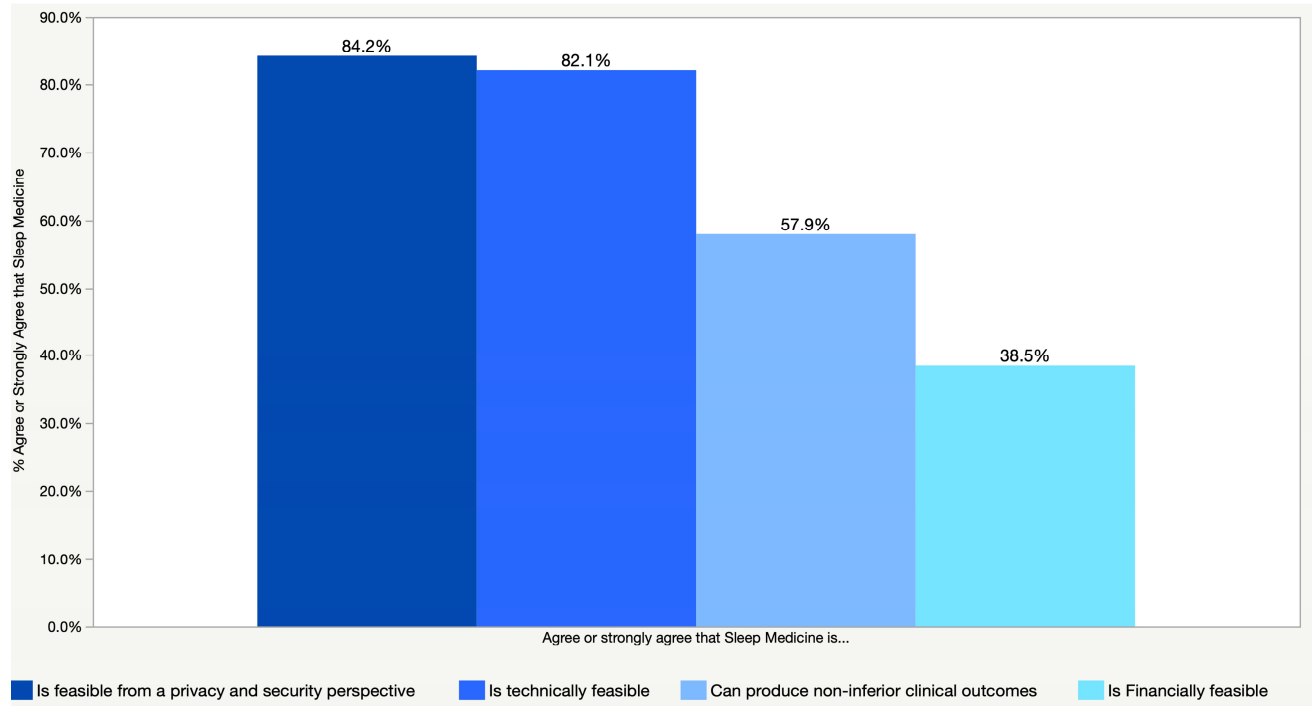

**Figure S1** - Respondents' agreement or strong agreement with telemedicine's feasibility in 4 domains.

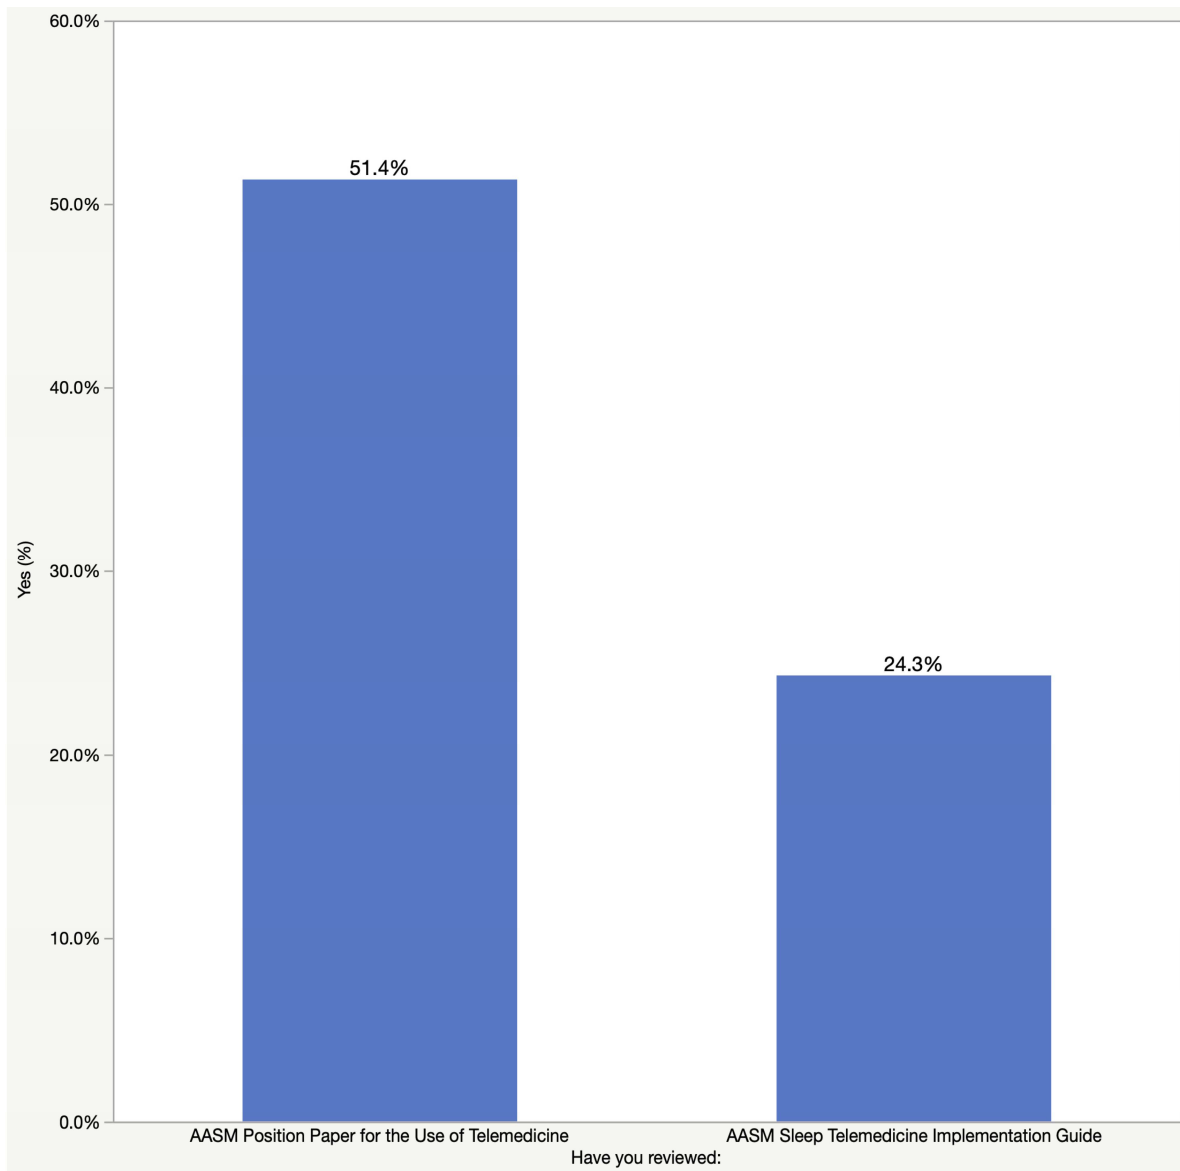

**Figure S2-** Percent of respondents who reviewed AASM telemedicine resources.
